# Supplementary material for: Panoramic view of clinical features of lupus erythematosus: a cross-sectional multicentre study from China
Source: HighWire-hosted journal article supplement (doi:10.1136/lupus-2022-000819), 2023-03-01

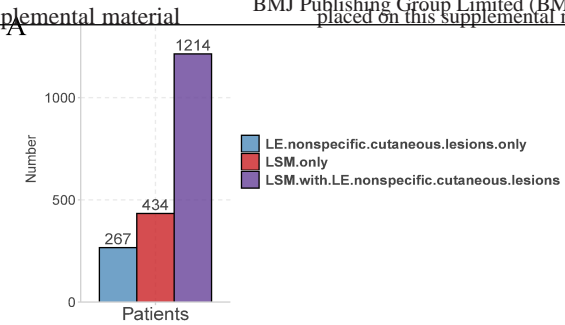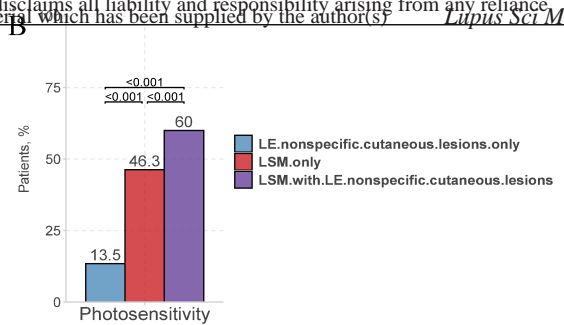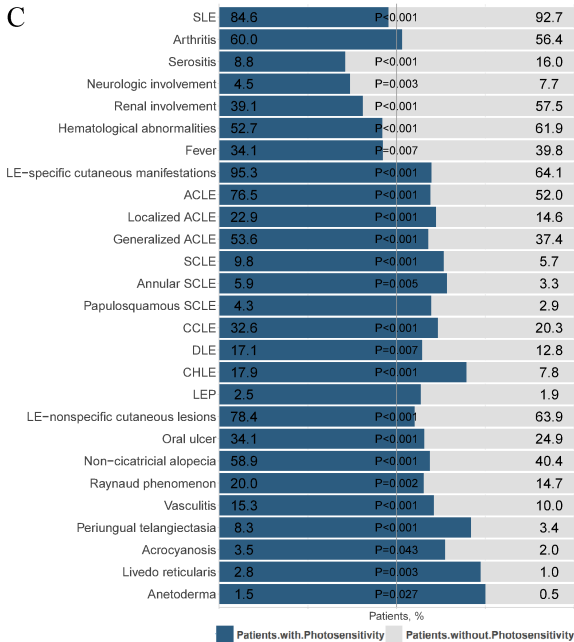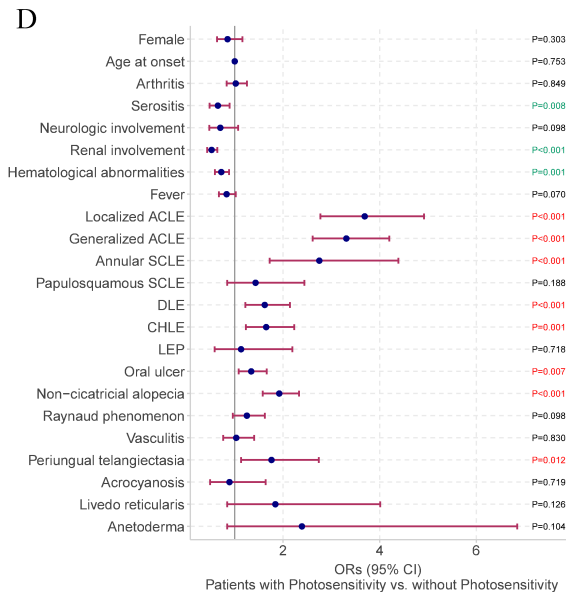

Supplement: lupus-2022-000819supp006_data_supplement.pdf [file lupus-2022-000819supp006_data_supplement.pdf]
