# Supplementary material for: Panoramic view of clinical features of lupus erythematosus: a cross-sectional multicentre study from China
Source: Lupus Sci Med. 2023 Mar 20;10(1):e000819. doi: 10.1136/lupus-2022-000819 (PMC10030678; doi:10.1136/lupus-2022-000819)
Supplement: Supplementary data [file lupus-2022-000819supp002.xlsx]

## Sheet: Sheet1
Supplement table 1: The overall demographic and clinical features in patients with SLE, CLE, and iCLE
	SLE	CLE	iCLE	p Value*	SLE vs CLE p Value‡	SLE vs iCLE p Value‡	CLE vs iCLE p Value‡
	(n=1865)	(n=1648）	（n=232)
Female	1690 (90.6)	1438 (87.3)	158 (68.1)	<0.001	0.002	<0.001	<0.001
Age at onset,median[IQR]	28 [21, 39]	27 [21, 38]	30 [21, 43]	0.0512	0.348	0.046	0.017
Age at study,median[IQR]	33 [25, 45]	33 [24, 44.2]	36 [25, 47]	0.1115	0.387	0.094	0.04
Course(Month),median[IQR]	36 [12, 84]	36 [12, 84]	28 [12, 69.8]	0.3404	0.697	0.206	0.136
Family history of LE	97 (5.2)	84 (5.1)	9 (3.9)	0.6866	0.95	0.479	0.523
Skin and mucous membrane	1691 (90.7)	1648 (100.0)	232 (100.0)	<0.001	<0.001	<0.001	NA
LE-specific cutaneous manifestations	1416 (75.9)	1648 (100.0)	232 (100.0)	<0.001	<0.001	<0.001	NA
LE-nonspecific cutaneous manifestations	1493 (80.1)	1412 (85.7)	194 (83.6)	<0.001	<0.001	0.229	0.464
Arthritis	1215 (65.1)	941 (57.1)	3 (1.3)	<0.001	<0.001	<0.001	<0.001
Serositis	266 (14.3)	155 (9.4)	0 (0.0)	<0.001	<0.001	<0.001	<0.001
Neurologic involvement	130 (7.0)	85 (5.2)	0 (0.0)	<0.001	0.03	<0.001	<0.001
Renal involvement	1026 (55.0)	720 (43.7)	0 (0.0)	<0.001	<0.001	<0.001	<0.001
Hematological abnormalities	1202 (64.5)	902 (54.7)	6 (2.6)	<0.001	<0.001	<0.001	<0.001
Fever	750 (40.2)	574 (34.8)	29 (12.5)	<0.001	0.001	<0.001	<0.001
ACLE	1234 (66.2)	1330 (80.7)	96 (41.4)	<0.001	<0.001	<0.001	<0.001
Localized ACLE	329 (17.6)	387 (23.5)	58 (25.0)	<0.001	<0.001	0.008	0.67
Generalized ACLE	905 (48.5)	943 (57.2)	38 (16.4)	<0.001	<0.001	<0.001	<0.001
SCLE	113 (6.1)	160 (9.7)	47 (20.3)	<0.001	<0.001	<0.001	<0.001
Annular SCLE	59 (3.2)	95 (5.8)	36 (15.5)	<0.001	<0.001	<0.001	<0.001
Papulosquamous SCLE	62 (3.3)	74 (4.5)	12 (5.2)	0.1285	0.089	0.211	0.766
CCLE	423 (22.7)	546 (33.1)	123 (53.0)	<0.001	<0.001	<0.001	<0.001
DLE	212 (11.4)	311 (18.9)	99 (42.7)	<0.001	<0.001	<0.001	<0.001
CHLE	223 (12.0)	262 (15.9)	39 (16.8)	0.0016	<0.001	0.045	0.796
LEP	39 (2.1)	45 (2.7)	6 (2.6)	0.4583	0.26	0.802	1
ACLE& SCLE	22 (1.2)	23 (1.4)	1 (0.4)	0.5318	0.676	0.504	0.349
ACLE& CCLE	261 (14.0)	287 (17.4)	26 (11.2)	0.0038	0.006	0.287	0.023
SCLE& CCLE	15 (0.8)	20 (1.2)	5 (2.2)	0.1254	0.294	0.101	0.386
ACLE& SCLE& CCLE	28 (1.5)	29 (1.8)	1 (0.4)	0.3236	0.638	0.363	0.166
Photosensitivity	825 (44.2)	929 (56.4)	150 (64.7)	<0.001	<0.001	<0.001	0.02
Oral ulcer	567 (30.4)	521 (31.6)	44 (19.0)	<0.001	0.46	<0.001	<0.001
Non-cicatricial alopecia	941 (50.5)	864 (52.4)	86 (37.1)	<0.001	0.257	<0.001	<0.001
Purpura	123 (6.6)	82 (5.0)	0 (0.0)	<0.001	0.049	<0.001	<0.001
Anetoderma	20 (1.1)	20 (1.2)	1 (0.4)	0.6918	0.815	0.722	0.502
Erythema multiforme	20 (1.1)	20 (1.2)	1 (0.4)	0.6918	0.815	0.722	0.502
Rheumatic nodule	9 (0.5)	10 (0.6)	1 (0.4)	0.8715	0.787	1	1
Sclerodactyly	25 (1.3)	20 (1.2)	1 (0.4)	0.6027	0.855	0.351	0.502
Calcinosis cutis	4 (0.2)	4 (0.2)	0 (0.0)	1	1	1	1
Papular mucinosis	1 (0.1)	1 (0.1)	1 (0.4)	0.1746	1	0.209	0.232
Bullous lesion	17 (0.9)	17 (1.0)	2 (0.9)	0.9263	0.849	1	1
Chronic urticaria	37 (2.0)	35 (2.1)	5 (2.2)	0.9526	0.863	1	1
Vasculitis	250 (13.4)	235 (14.3)	11 (4.7)	<0.001	0.494	<0.001	<0.001
Raynaud phenomenon	347 (18.6)	276 (16.7)	13 (5.6)	<0.001	0.163	<0.001	<0.001
Periungual telangiectasia	114 (6.1)	108 (6.6)	5 (2.2)	0.0313	0.641	0.021	0.013
Livedo reticularis	35 (1.9)	34 (2.1)	3 (1.3)	0.793	0.783	0.793	0.614
Thrombophlebitis	9 (0.5)	7 (0.4)	0 (0.0)	0.9226	0.998	0.609	1
Acrocyanosis	50 (2.7)	52 (3.2)	6 (2.6)	0.6767	0.462	1	0.79
ANA(+)†	1830/1865 (98.1)	1561/1644 (95.0)	174/228 (76.3)	<0.001	<0.001	<0.001	<0.001
Anti-dsDNA Ab(+)†	1107/1853 (59.7)	838/1634 (51.3)	41/226 (18.1)	<0.001	<0.001	<0.001	<0.001
Anti-Sm Ab(+)†	760/1853 (41.0)	644/1634 (39.4)	48/226 (21.2)	<0.001	0.353	<0.001	<0.001
Antiphospholipid Ab(+)†	98/669 (14.6)	72/545 (13.2)	8/61 (13.1)	0.7577	0.526	0.892	1
ANCA(+)†	176/1848 (9.5)	108/1633 (6.6)	2/226 (0.9)	<0.001	0.002	<0.001	<0.001
Anti-SSA/Ro60 Ab(+)†	1129/1848 (61.1)	1018/1633 (62.3)	137/226 (60.6)	0.7154	0.4717	0.9477	0.6698
Anti-SSA/Ro52 Ab(+)†	636/1848 (34.4)	572/1633 (35.0)	82/226 (36.3)	0.8283	0.7317	0.6291	0.7671
Anti-SSB Ab(+)†	365/1848 (19.8)	335/1633 (20.5)	57/226 (25.2)	0.1554	0.604	0.066	0.124
Anti-U1-nRNP Ab(+)†	732/1848 (39.6)	624/1633 (38.2)	46/226 (20.4)	<0.001	0.418	<0.001	<0.001
Anti-P Ab(+)†	625/1848 (33.8)	558/1633 (34.2)	51/226 (22.6)	0.0019	0.856	<0.001	<0.001
Anti-histone Ab(+)†	459/1848 (24.8)	351/1633 (21.5)	16/226 (7.1)	<0.001	0.022	<0.001	<0.001
Anti-nucleosome Ab(+)†	573/1848 (31.0)	443/1633 (27.1)	17/226 (7.5)	<0.001	0.013	<0.001	<0.001
Anti-PCNA Ab(+)†	54/1848 (2.9)	48/1633 (2.9)	1/226 (0.4)	0.055	1	0.026	0.024
Anti-Scl-70 Ab(+)†	0/1848 (0.0)	0/1633 (0.0)	0/226 (0.0)	NA	NA	NA	NA
Anti-PM/Scl Ab(+)†	14/1848 (0.8)	13/1633 (0.8)	1/226 (0.4)	1	1	1	1
Anti-CENP-B Ab(+)†	67/1848 (3.6)	50/1633 (3.1)	3/226 (1.3)	0.1551	0.408	0.078	0.198
Anti-Jo-1 Ab(+)†	18/1848 (1.0)	13/1633 (0.8)	0/226 (0.0)	0.372	0.706	0.248	0.388
AMA-M2 (+)‡	80/1848 (4.3)	68/1633 (4.2)	7/226 (3.1)	0.6823	0.876	0.486	0.56
Unless otherwise indicated, values are presented as n (%).
*Comparison between SLE, CLE and iCLE, overall p-value.
†Assessed in patients who have undergone antibody testing, values are presented as n/N(%).
‡For multiple comparisons, p-value < Bonferroni-corrected p-value, Bonferroni-corrected p-value=0.017.
Abbreviations: IQR, interquartile range; LE, lupus erythematosus; SLE, systemic lupus erythematosus; CLE, cutaneous lupus erythematosus; iCLE, isolated cutaneous lupus erythematosus; ACLE, acute CLE; SCLE, subacute CLE; CCLE, chronic CLE; DLE, discoid LE; CHLE, chilblain LE; LEP, LE profundus; Ab, antibody; ANA, antinuclear antibody; Anti-dsDNA Ab, anti-double-stranded DNA antibody; Anti-Sm Ab, a…
