# Supplementary material for: Panoramic view of clinical features of lupus erythematosus: a cross-sectional multicentre study from China
Source: Lupus Sci Med. 2023 Mar 20;10(1):e000819. doi: 10.1136/lupus-2022-000819 (PMC10030678; doi:10.1136/lupus-2022-000819)
Supplement: Supplementary data [file lupus-2022-000819supp003.xlsx]

## Sheet: Sheet1
Supplement table 2: Clinical manifestations of SLE patients with and without LE-specific cutaneous manifestations, and CLE patients with and without systemic involvement
	SLE				CLE
	With LE-specific cutaneous manifestations	Without LE-specific cutaneous manifestations	p Value		With systemic involvement	Without systemic involvement	p Value
	(n=1416)	(n=449)			(n=1416)	(n=232)
Female	1280 (90.4)	410 (91.3)	0.625		1280 (90.4)	158 (68.1)	<0.001
Age at onset,median[IQR]	27 [21, 38]	30 [23, 41]	<0.001		27 [21, 38]	30 [21, 43]	0.006
Age at study,median[IQR]	32 [24, 44]	36 [26, 47]	<0.001		32 [24, 44]	36 [25, 47]	0.018
Course(Month),median[IQR]	36 [12, 84]	32 [8, 84]	0.023		36 [12, 84]	28 [12, 69.8]	0.086
Family history of LE	75 (5.3)	22 (4.9)	0.835		75 (5.3)	9 (3.9)	0.454
Skin and mucous membrane	1416 (100.0)	275 (61.2)	<0.001		1416 (100.0)	232 (100.0)	NA
LE-specific cutaneous manifestations	1416 (100.0)	0 (0.0)	<0.001		1416 (100.0)	232 (100.0)	NA
LE-nonspecific cutaneous manifestations	1218 (86.0)	275 (61.2)	<0.001		1218 (86.0)	194 (83.6)	0.387
Arthritis	938 (66.2)	277 (61.7)	0.088		938 (66.2)	3 (1.3)	<0.001
Serositis	155 (10.9)	111 (24.7)	<0.001		155 (10.9)	0 (0.0)	<0.001
Neurologic involvement	85 (6.0)	45 (10.0)	0.005		85 (6.0)	0 (0.0)	<0.001
Renal involvement	720 (50.8)	306 (68.2)	<0.001		720 (50.8)	0 (0.0)	<0.001
Hematological abnormalities	896 (63.3)	306 (68.2)	0.068		896 (63.3)	6 (2.6)	<0.001
Fever	545 (38.5)	205 (45.7)	0.008		545 (38.5)	29 (12.5)	<0.001
ACLE	1234 (87.1)	0 (0.0)	<0.001		1234 (87.1)	96 (41.4)	<0.001
Localized ACLE	329 (23.2)	0 (0.0)	<0.001		329 (23.2)	58 (25.0)	0.614
Generalized ACLE	905 (63.9)	0 (0.0)	<0.001		905 (63.9)	38 (16.4)	<0.001
SCLE	113 (8.0)	0 (0.0)	<0.001		113 (8.0)	47 (20.3)	<0.001
Annular SCLE	59 (4.2)	0 (0.0)	<0.001		59 (4.2)	36 (15.5)	<0.001
Papulosquamous SCLE	62 (4.4)	0 (0.0)	<0.001		62 (4.4)	12 (5.2)	0.711
CCLE	423 (29.9)	0 (0.0)	<0.001		423 (29.9)	123 (53.0)	<0.001
DLE	212 (15.0)	0 (0.0)	<0.001		212 (15.0)	99 (42.7)	<0.001
CHLE	223 (15.7)	0 (0.0)	<0.001		223 (15.7)	39 (16.8)	0.754
LEP	39 (2.8)	0 (0.0)	<0.001		39 (2.8)	6 (2.6)	1
ACLE& SCLE	22 (1.6)	0 (0.0)	0.004		22 (1.6)	1 (0.4)	0.236
ACLE& CCLE	261 (18.4)	0 (0.0)	<0.001		261 (18.4)	26 (11.2)	0.009
SCLE& CCLE	15 (1.1)	0 (0.0)	0.029		15 (1.1)	5 (2.2)	0.276
ACLE& SCLE& CCLE	28 (2.0)	0 (0.0)	<0.001		28 (2.0)	1 (0.4)	0.11
Photosensitivity	779 (55.0)	46 (10.2)	<0.001		779 (55.0)	150 (64.7)	0.008
Oral ulcer	477 (33.7)	90 (20.0)	<0.001		477 (33.7)	44 (19.0)	<0.001
Non-cicatricial alopecia	778 (54.9)	163 (36.3)	<0.001		778 (54.9)	86 (37.1)	<0.001
Purpura	82 (5.8)	41 (9.1)	0.018		82 (5.8)	0 (0.0)	<0.001
Anetoderma	19 (1.3)	1 (0.2)	0.061		19 (1.3)	1 (0.4)	0.343
Erythema multiforme	19 (1.3)	1 (0.2)	0.061		19 (1.3)	1 (0.4)	0.343
Rheumatic nodule	9 (0.6)	0 (0.0)	0.125		9 (0.6)	1 (0.4)	1
Sclerodactyly	19 (1.3)	6 (1.3)	1		19 (1.3)	1 (0.4)	0.343
Calcinosis cutis	4 (0.3)	0 (0.0)	0.578		4 (0.3)	0 (0.0)	1
Papular mucinosis	0 (0.0)	1 (0.2)	0.241		0 (0.0)	1 (0.4)	0.141
Bullous lesion	15 (1.1)	2 (0.4)	0.391		15 (1.1)	2 (0.9)	1
Chronic urticaria	30 (2.1)	7 (1.6)	0.585		30 (2.1)	5 (2.2)	1
Vasculitis	224 (15.8)	26 (5.8)	<0.001		224 (15.8)	11 (4.7)	<0.001
Raynaud phenomenon	263 (18.6)	84 (18.7)	1		263 (18.6)	13 (5.6)	<0.001
Periungual telangiectasia	103 (7.3)	11 (2.4)	<0.001		103 (7.3)	5 (2.2)	0.006
Livedo reticularis	31 (2.2)	4 (0.9)	0.108		31 (2.2)	3 (1.3)	0.616
Thrombophlebitis	7 (0.5)	2 (0.4)	1		7 (0.5)	0 (0.0)	0.603
Acrocyanosis	46 (3.2)	4 (0.9)	0.006		46 (3.2)	6 (2.6)	0.74
ANA(+)*	1387/1416 (98.0)	443/449 (98.7)	0.442		1387/1416 (98.0)	174/228 (76.3)	<0.001
Anti-dsDNA Ab(+)*	797/1408 (56.6)	310/445 (69.7)	<0.001		797/1408 (56.6)	41/226 (18.1)	<0.001
Anti-Sm Ab(+)*	596/1408 (42.3)	164/445 (36.9)	0.046		596/1408 (42.3)	48/226 (21.2)	<0.001
Antiphospholipid Ab(+)*	64/484 (13.2)	34/185 (18.4)	0.118		64/484 (13.2)	8/61 (13.1)	1
ANCA(+)*	106/1407 (7.5)	70/441 (15.9)	<0.001		106/1407 (7.5)	2/226 (0.9)	<0.001
Anti-SSA/Ro60 Ab(+)*	881/1407 (62.6)	248/441 (56.2)	0.0192		881/1407 (62.6)	137/226 (60.6)	0.6164
Anti-SSA/Ro52 Ab(+)*	490/1407 (34.8)	146/441 (33.1)	0.5447		490/1407 (34.8)	82/226 (36.3)	0.7255
Anti-SSB Ab(+)*	278/1407 (19.8)	87/441 (19.7)	1		278/1407 (19.8)	57/226 (25.2)	0.072
Anti-U1-nRNP Ab(+)*	578/1407 (41.1)	154/441 (34.9)	0.024		578/1407 (41.1)	46/226 (20.4)	<0.001
Anti-P Ab(+)*	507/1407 (36.0)	118/441 (26.8)	<0.001		507/1407 (36.0)	51/226 (22.6)	<0.001
Anti-Histone Ab(+)*	335/1407 (23.8)	124/441 (28.1)	0.078		335/1407 (23.8)	16/226 (7.1)	<0.001
Anti-nucleosome Ab(+)*	426/1407 (30.3)	147/441 (33.3)	0.249		426/1407 (30.3)	17/226 (7.5)	<0.001
Anti-PCNA Ab(+)*	47/1407 (3.3)	7/441 (1.6)	0.081		47/1407 (3.3)	1/226 (0.4)	0.029
Anti-Scl-70 Ab(+)*	0/1407 (0.0)	0/441 (0.0)	NA		0/1407 (0.0)	0/226 (0.0)	NA
Anti-PM/Scl Ab(+)*	12/1407 (0.9)	2/441 (0.5)	0.539		12/1407 (0.9)	1/226 (0.4)	1
Anti-CENP-B Ab(+)*	47/1407 (3.3)	20/441 (4.5)	0.305		47/1407 (3.3)	3/226 (1.3)	0.155
Anti-Jo-1 Ab(+)*	13/1407 (0.9)	5/441 (1.1)	0.91		13/1407 (0.9)	0/226 (0.0)	0.295
AMA-M2 (+)*	61/1407 (4.3)	19/441 (4.3)	1		61/1407 (4.3)	7/226 (3.1)	0.493
Unless otherwise indicated, values are presented as n (%).
*Assessed in patients who have undergone antibody testing, values are presented as n/N(%).
Abbreviations: IQR, interquartile range; LE, lupus erythematosus; SLE, systemic lupus erythematosus; CLE, cutaneous lupus erythematosus; iCLE, isolated cutaneous lupus erythematosus; ACLE, acute CLE; SCLE, subacute CLE; CCLE, chronic CLE; DLE, discoid LE; CHLE, chilblain LE; LEP, LE profundus; Ab, antibody; ANA, antinuclear antibody; Anti-dsDNA Ab, anti-double-stranded DNA antibody; Anti-Sm Ab, a…
