# Supplementary material for: Panoramic view of clinical features of lupus erythematosus: a cross-sectional multicentre study from China
Source: Lupus Sci Med. 2023 Mar 20;10(1):e000819. doi: 10.1136/lupus-2022-000819 (PMC10030678; doi:10.1136/lupus-2022-000819)
Supplement: Supplementary data [file lupus-2022-000819supp005.xlsx]

## Sheet: Sheet1
Supplement table 4: Regression analysis between CLE patients with system involvement vs. without system involvement.
	adj. OR (95%CI)	p Value*
Female	1.86 (1.16 to 2.98)	0.01
Age.at.onset	1.01 (1 to 1.02)	0.152
Localized ACLE	1.04 (0.43 to 2.49)	0.938
Generalized ACLE	3.83 (1.63 to 9.02)	0.002
Annular SCLE	0.34 (0.14 to 0.84)	0.02
Papulosquamous SCLE	0.79 (0.3 to 2.1)	0.637
DLE	0.43 (0.18 to 1.01)	0.053
CHLE	0.44 (0.18 to 1.12)	0.085
LEP	0.62 (0.19 to 2.01)	0.426
Combined two or more subtypes of CLE	3.25 (1.14 to 9.29)	0.028
Photosensitivity	0.68 (0.47 to 0.98)	0.039
Oral ulcer	1.37 (0.9 to 2.08)	0.144
Non-cicatricial alopecia	1.64 (1.14 to 2.36)	0.008
Vasculitis	1.88 (0.94 to 3.75)	0.073
Raynaud phenomenon	2.25 (1.17 to 4.29)	0.014
ANA(+)	5.88 (3.08 to 11.22)	< 0.001
Anti-dsDNA Ab(+)	2.53 (1.65 to 3.88)	< 0.001
ANCA(+)	1.96 (0.44 to 8.76)	0.379
Anti-U1-nRNP Ab(+)	1.35 (0.9 to 2.02)	0.152
Anti-nucleosome Ab(+)	1.99 (1.12 to 3.55)	0.019
*From Wald's test.
Abbreviations: CLE, cutaneous lupus erythematosus; OR, odds ratio; ACLE, acute CLE; SCLE, subacute CLE; CCLE, chronic CLE; DLE, discoid LE; CHLE, chilblain LE; LEP, LE profundus; Ab, antibody; ANA, antinuclear antibody; Anti-dsDNA Ab, anti-double-stranded DNA antibody; ANCA, anti-neutrophil cytoplasmic antibodies; Anti-U1-nRNP Ab,anti-U1 nuclear ribonucleoprotein antibody
