# Supplementary material for: Panoramic view of clinical features of lupus erythematosus: a cross-sectional multicentre study from China
Source: Lupus Sci Med. 2023 Mar 20;10(1):e000819. doi: 10.1136/lupus-2022-000819 (PMC10030678; doi:10.1136/lupus-2022-000819)
Supplement: Supplementary data [file lupus-2022-000819supp007.xlsx]

## Sheet: Sheet1
Supplement table 5: Clinical Manifestations of patients with ACLE/ SCLE/ CCLE
	ACLE	SCLE	CCLE	p Value*	ACLE vs SCLE p Value‡	ACLE vs CCLE p Value‡	SCLE vs CCLE p Value‡
	(n=1330)	(n=160)	(n=546)
Female	1222 (91.9)	121 (75.6)	437 (80.0)	<0.001	<0.001	<0.001	0.273
Age at onset,median[IQR]	27 [20, 37]	30 [21, 40]	28.5 [21, 40]	0.005	0.048	0.004	0.86
Age at study,median[IQR]	32 [24, 43]	34 [25, 47]	35 [25.2, 46.8]	<0.001	0.038	<0.001	0.803
Course(Month),median[IQR]	36 [12, 83.8]	36 [12, 86]	37.5 [15, 85.8]	0.065	0.961	0.022	0.185
Family history of LE	68 (5.1)	10 (6.2)	35 (6.4)	0.495	0.673	0.313	1
Skin and mucous membrane	1330 (100.0)	160 (100.0)	546 (100.0)	NA	NA	NA	NA
LE-specific cutaneous manifestations	1330 (100.0)	160 (100.0)	546 (100.0)	NA	NA	NA	NA
LE-nonspecific cutaneous manifestations	1141 (85.8)	142 (88.8)	480 (87.9)	0.333	0.367	0.253	0.882
Arthritis	819 (61.6)	77 (48.1)	296 (54.2)	<0.001	0.001	0.004	0.205
Serositis	145 (10.9)	13 (8.1)	45 (8.2)	0.156	0.346	0.099	1
Neurologic involvement	79 (5.9)	2 (1.2)	26 (4.8)	0.021	0.009	0.369	0.062
Renal involvement	654 (49.2)	51 (31.9)	179 (32.8)	<0.001	<0.001	<0.001	0.905
Hematological abnormalities	786 (59.1)	75 (46.9)	272 (49.8)	<0.001	0.004	<0.001	0.572
Fever	505 (38.0)	47 (29.4)	175 (32.1)	0.011	0.041	0.018	0.586
ACLE	1330 (100.0)	52 (32.5)	316 (57.9)	<0.001	<0.001	<0.001	<0.001
Localized ACLE	387 (29.1)	9 (5.6)	86 (15.8)	<0.001	<0.001	<0.001	0.002
Generalized ACLE	943 (70.9)	43 (26.9)	230 (42.1)	<0.001	<0.001	<0.001	<0.001
SCLE	52 (3.9)	160 (100.0)	49 (9.0)	<0.001	<0.001	<0.001	<0.001
Annular SCLE	24 (1.8)	95 (59.4)	25 (4.6)	<0.001	<0.001	0.001	<0.001
Papulosquamous SCLE	33 (2.5)	74 (46.2)	30 (5.5)	<0.001	<0.001	0.002	<0.001
CCLE	316 (23.8)	49 (30.6)	546 (100.0)	<0.001	0.07	<0.001	<0.001
DLE	129 (9.7)	24 (15.0)	311 (57.0)	<0.001	0.051	<0.001	<0.001
CHLE	196 (14.7)	30 (18.8)	262 (48.0)	<0.001	0.222	<0.001	<0.001
LEP	25 (1.9)	4 (2.5)	45 (8.2)	<0.001	0.543	<0.001	0.012
ACLE& SCLE	23 (1.7)	23 (14.4)	0 (0.0)	<0.001	<0.001	<0.001	<0.001
ACLE& CCLE	287 (21.6)	0 (0.0)	287 (52.6)	<0.001	<0.001	<0.001	<0.001
SCLE& CCLE	0 (0.0)	20 (12.5)	20 (3.7)	<0.001	<0.001	<0.001	<0.001
ACLE& SCLE& CCLE	29 (2.2)	29 (18.1)	29 (5.3)	<0.001	<0.001	<0.001	<0.001
Photosensitivity	746 (56.1)	96 (60.0)	318 (58.2)	0.502	0.391	0.422	0.76
Oral ulcer	453 (34.1)	38 (23.8)	171 (31.3)	0.025	0.011	0.275	0.081
Non-cicatricial alopecia	720 (54.1)	76 (47.5)	300 (54.9)	0.234	0.132	0.788	0.117
Purpura	75 (5.6)	9 (5.6)	27 (4.9)	0.83	1	0.624	0.889
Anetoderma	16 (1.2)	5 (3.1)	11 (2.0)	0.113	0.111	0.26	0.598
Erythema multiforme	18 (1.4)	6 (3.8)	10 (1.8)	0.078	0.052	0.571	0.258
Rheumatic nodule	9 (0.7)	1 (0.6)	8 (1.5)	0.199	1	0.171	0.692
Sclerodactyly	19 (1.4)	3 (1.9)	11 (2.0)	0.583	0.724	0.474	1
Calcinosis cutis	4 (0.3)	1 (0.6)	4 (0.7)	0.306	0.434	0.241	1
Papular mucinosis	0 (0.0)	0 (0.0)	1 (0.2)	0.347	NA	0.291	1
Bullous lesion	16 (1.2)	0 (0.0)	4 (0.7)	0.357	0.403	0.464	0.579
Chronic urticaria	31 (2.3)	4 (2.5)	21 (3.8)	0.191	0.785	0.097	0.626
Vasculitis	201 (15.1)	28 (17.5)	99 (18.1)	0.239	0.5	0.121	0.947
Raynaud phenomenon	240 (18.0)	30 (18.8)	107 (19.6)	0.732	0.912	0.471	0.901
Periungual telangiectasia	97 (7.3)	15 (9.4)	45 (8.2)	0.559	0.433	0.542	0.771
Livedo reticularis	31 (2.3)	4 (2.5)	9 (1.6)	0.624	0.785	0.451	0.505
Thrombophlebitis	6 (0.5)	0 (0.0)	4 (0.7)	0.572	1	0.489	0.579
Acrocyanosis	43 (3.2)	8 (5.0)	30 (5.5)	0.059	0.352	0.03	0.964
ANA(+)†	1295/1329 (97.4)	151/159 (95.0)	492/543 (90.6)	<0.001	0.127	<0.001	0.114
Anti-dsDNA Ab(+)†	753/1323 (56.9)	49/157 (31.2)	212/212 (39.4)	<0.001	<0.001	<0.001	0.076
Anti-Sm Ab(+)†	570/1323 (43.1)	48/157 (30.6)	187/538 (34.8)	<0.001	0.004	0.001	0.379
Antiphospholipid Ab(+)†	62/458 (13.5)	7/59 (11.9)	17/140 (12.1)	0.874	0.879	0.777	1
ANCA(+)†	94/1322 (7.1)	10/157 (6.4)	33/538 (6.1)	0.732	0.859	0.512	1
Anti-SSA/Ro60 Ab(+)†	827/1322 (62.6)	109/157 (69.4)	335/538 (62.3)	0.2212	0.1094	0.949	0.1215
Anti-SSA/Ro52 Ab(+)†	460/1322 (34.8)	64/157 (40.8)	186/538 (34.6)	0.3137	0.1645	0.9697	0.1842
Anti-SSB Ab(+)†	252/1322 (19.1)	59/157 (37.6)	95/538 (17.7)	<0.001	<0.001	0.523	<0.001
Anti-U1-nRNP Ab(+)†	551/1322 (41.7)	30/157 (19.1)	184/538 (34.2)	<0.001	<0.001	0.003	<0.001
Anti-P Ab(+)†	483/1322 (36.5)	45/157 (28.7)	163/538 (30.3)	0.011	0.063	0.012	0.768
Anti-histone Ab(+)†	325/1322 (24.6)	16/157 (10.2)	94/538 (17.5)	<0.001	<0.001	0.001	0.038
Anti-nucleosome Ab(+)†	401/1322 (30.3)	23/157 (14.6)	104/538 (19.3)	<0.001	<0.001	<0.001	0.223
Anti-PCNA Ab(+)†	39/1322 (3.0)	6/157 (3.8)	17/538 (3.2)	0.829	0.722	0.928	0.877
Anti-Scl-70 Ab(+)†	0/1322 (0.0)	0/157 (0.0)	0/538 (0.0)	NA	NA	NA	NA
Anti-PM/Scl Ab(+)†	10/1322 (0.8)	0/157 (0.0)	5/538 (0.9)	0.698	0.612	0.927	0.593
Anti-CENP-B Ab(+)†	42/1322 (3.2)	1/157 (0.6)	18/538 (3.3)	0.178	0.079	0.967	0.092
Anti-Jo-1 Ab(+)†	13/1322 (1.0)	2/157 (1.3)	5/538 (0.9)	0.87	0.668	1	0.659
AMA-M2 (+)†	60/1322 (4.5)	7/157 (4.5)	18/538 (3.3)	0.503	1	0.3	0.678
Unless otherwise indicated, values are presented as n (%).
*Comparison; between ACLE, ACLE, CCLE, overall p-value.
†Assessed in patients who have undergone antibody testing, values are presented as n/N(%).
‡For multiple comparisons, p-value < Bonferroni-corrected p-value, Bonferroni-corrected p-value=0.017.
Abbreviations: IQR, interquartile range; LE, lupus erythematosus; SLE, systemic lupus erythematosus; CLE, cutaneous lupus erythematosus; iCLE, isolated cutaneous lupus erythematosus; ACLE, acute CLE; SCLE, subacute CLE; CCLE, chronic CLE; DLE, discoid LE; CHLE, chilblain LE; LEP, LE profundus; Ab, antibody; ANA, antinuclear antibody; Anti-dsDNA Ab, anti-double-stranded DNA antibody; Anti-Sm Ab, a…
