# Supplementary material for: Panoramic view of clinical features of lupus erythematosus: a cross-sectional multicentre study from China
Source: Lupus Sci Med. 2023 Mar 20;10(1):e000819. doi: 10.1136/lupus-2022-000819 (PMC10030678; doi:10.1136/lupus-2022-000819)
Supplement: Supplementary data [file lupus-2022-000819supp009.xlsx]

## Sheet: Sheet1
Supplement table 7: Regression analysis between LE patients: with SCLE vs. without SCLE.
	adj. OR(95%CI)	p Value*
Female	0.53 (0.34 to 0.83)	0.005
Age at onset	1.00 (0.99 to 1.01)	0.948
Arthritis	0.93 (0.64 to 1.33)	0.679
Serositis	1.28 (0.68 to 2.43)	0.442
Neurologic involvement	0.25 (0.06 to 1.05)	0.058
Renal involvement	0.85 (0.57 to 1.28)	0.44
Hematological abnormalities	0.89 (0.62 to 1.28)	0.533
Fever	1.00 (0.67 to 1.49)	0.988
Photosensitivity	1.10 (0.77 to 1.58)	0.594
Oral ulcer	0.77 (0.51 to 1.17)	0.224
ANA(+)	1.92 (0.84 to 4.36)	0.121
Anti-dsDNA Ab(+)	0.49 (0.33 to 0.74)	< 0.001
Anti-Sm Ab(+)	1.04 (0.69 to 1.58)	0.841
Antiphospholipid Ab(+)	1.03 (0.43 to 2.46)	0.952
Anti-SSA/Ro60 Ab(+)	1.14 (0.74 to 1.76)	0.557
Anti-SSA/Ro52 Ab(+)	1.18 (0.79 to 1.76)	0.426
Anti-SSB Ab(+)	1.97 (1.31 to 2.96)	0.001
Anti-U1-nRNP Ab(+)	0.35 (0.22 to 0.56)	< 0.001
Anti-CENP-B Ab(+)	0.19 (0.03 to 1.38)	0.101
Abbreviations: LE, lupus erythematosus; SCLE, subacute cutaneous lupus erythematosus; OR, odds ratio; Ab, antibody; ANA, antinuclear antibody; Anti-dsDNA Ab, anti-double-stranded DNA antibody; Anti-Sm Ab, anti-Smith antibody; AAnti-SSA/Ro60 Ab,anti-Sjögren's-syndrome-related antigen A (SSA)/Ro 60 kDa antibody; Anti-SSA/Ro52 Ab,anti-Sjögren's-syndrome-related antigen A (SSA)/Ro 52 kDa antibody; An…
