# Supplementary material for: Panoramic view of clinical features of lupus erythematosus: a cross-sectional multicentre study from China
Source: Lupus Sci Med. 2023 Mar 20;10(1):e000819. doi: 10.1136/lupus-2022-000819 (PMC10030678; doi:10.1136/lupus-2022-000819)
Supplement: Supplementary data [file lupus-2022-000819supp010.xlsx]

## Sheet: Sheet1
Supplement table 8: Regression analysis between LE patients: with CCLE vs. without CCLE.
	adj. OR (95%CI)	p Value*
Female	0.48 (0.35,0.66)	< 0.001
Age at onset	1.00 (0.99,1.01)	0.437
Arthritis	1.01 (0.80,1.26)	0.959
Serositis	1.07 (0.73,1.57)	0.718
Neurologic involvement	1.17 (0.71,1.92)	0.547
Renal involvement	0.66 (0.52,0.85)	< 0.001
Hematological abnormalities	0.92 (0.74,1.15)	0.482
Fever	1.03 (0.81,1.31)	0.797
Photosensitivity	0.97 (0.78,1.22)	0.812
Oral ulcer	1.13 (0.89,1.44)	0.306
ANA(+)	0.48 (0.29,0.79)	0.004
Anti-dsDNA Ab(+)	0.70 (0.55,0.90)	0.006
Anti-Sm Ab(+)	0.95 (0.75,1.19)	0.653
Antiphospholipid Ab(+)	1.05 (0.58,1.92)	0.867
Anti-SSB Ab(+)	0.70 (0.53,0.92)	0.012
Anti-nucleosome Ab(+)	0.75 (0.57,1.00)	0.046
*From Wald's test.
Abbreviations: CCLE, chronic cutaneous lupus erythematosus; OR, odds ratio; Ab, antibody; ANA, antinuclear antibody; Anti-dsDNA Ab, anti-double-stranded DNA antibody; Anti-Sm Ab, anti-Smith antibody; Anti-SSB Ab, anti-Sjögren's-syndrome-related antigen B antibody.
