# Supplementary material for: Panoramic view of clinical features of lupus erythematosus: a cross-sectional multicentre study from China
Source: Lupus Sci Med. 2023 Mar 20;10(1):e000819. doi: 10.1136/lupus-2022-000819 (PMC10030678; doi:10.1136/lupus-2022-000819)
Supplement: Supplementary data [file lupus-2022-000819supp012.xlsx]

## Sheet: Sheet1
List of Participants in Multi-center Study
Name	Mailbox	Address
Tao Huang	355613229@qq.com	Department of Dermatology, the Second Xiangya Hospital, Central South University, Changsha, China
Ming Zhao	zhaoming307@126.com	Department of Dermatology, the Second Xiangya Hospital, Central South University, Changsha, China
Haijing Wu	chriswu1010@126.com	Department of Dermatology, the Second Xiangya Hospital, Central South University, Changsha, China
Hai Long	dr.hailong@csu.edu.cn	Department of Dermatology, the Second Xiangya Hospital, Central South University, Changsha, China
Siqi Fu	fusiqi@csu.edu.cn	Department of Dermatology, the Second Xiangya Hospital, Central South University, Changsha, China
Ruifang Wu	ruifangwu@csu.edu.cn	Department of Dermatology, the Second Xiangya Hospital, Central South University, Changsha, China
Heng Yin	kevinyin1984@aliyun.com	Department of Dermatology, the Second Xiangya Hospital, Central South University, Changsha, China
Jieyue Liao	Jieyuexiaoqian@163.com	Department of Dermatology, the Second Xiangya Hospital, Central South University, Changsha, China
Shuangyan Luo	dr.shuangyanluo@csu.edu.cn	Department of Dermatology, the Second Xiangya Hospital, Central South University, Changsha, China
Yu Liu	dr.yuliu@csu.edu.cn	Department of Dermatology, the Second Xiangya Hospital, Central South University, Changsha, China
Qing Zhang	zhangqing3135@163.com	Department of Dermatology, the Second Xiangya Hospital, Central South University, Changsha, China
Peng Zhang	zhangpeng@csu.edu.cn	Department of Dermatology, the Second Xiangya Hospital, Central South University, Changsha, China
Yixin Tan	tyx0711@csu.edu.cn	Department of Dermatology, the Second Xiangya Hospital, Central South University, Changsha, China
Shuaihantian Luo	lsht5309@csu.edu.cn	Department of Dermatology, the Second Xiangya Hospital, Central South University, Changsha, China
Xin Huang	xin_huang@csu.edu.cn	Department of Dermatology, the Second Xiangya Hospital, Central South University, Changsha, China
Yaxiong Deng	deng.yaxiong@163.com	Department of Dermatology, the Second Xiangya Hospital, Central South University, Changsha, China
Wei Liao	18573101664@163.com	Department of Dermatology, the Second Xiangya Hospital, Central South University, Changsha, China
Liu Duan	sky6268@qq.com	Department of Dermatology, the Second Xiangya Hospital, Central South University, Changsha, China
Jianbo Chen	chenjianbowy@163.com	Department of Dermatology, the Second Xiangya Hospital, Central South University, Changsha, China
Yin Zhou	zhouyin9785@126.com	Department of Dermatology, the Second Xiangya Hospital, Central South University, Changsha, China
Jinghua Yin	jinghuayin@csu.edu.cn	Department of Dermatology, the Second Xiangya Hospital, Central South University, Changsha, China
Hong Qiu	157799308@qq.com	Department of Dermatology, the Second Xiangya Hospital, Central South University, Changsha, China
Jin Yuan	591845242@qq.com	Department of Dermatology, the Second Xiangya Hospital, Central South University, Changsha, China
Zijun Wang	vinciwzj@gmail.com	Department of Dermatology, the Second Xiangya Hospital, Central South University, Changsha, China
Mengying Li	freya0716@163.com	Department of Dermatology, the Second Xiangya Hospital, Central South University, Changsha, China
Xiaoqi Wu	1193145612@qq.com	Department of Dermatology, the Second Xiangya Hospital, Central South University, Changsha, China
Lina Chen	1176224963@qq.com	Department of Dermatology, the Second Xiangya Hospital, Central South University, Changsha, China
Liangmin Cai	737516356@qq.com	Department of Dermatology, the Second Xiangya Hospital, Central South University, Changsha, China
Cancan Huang	huangcancan001@csu.edu.cn	Department of Dermatology, the Second Xiangya Hospital, Central South University, Changsha, China
Qianwen Li	qianwenli@csu.edu.cn	Department of Dermatology, the Second Xiangya Hospital, Central South University, Changsha, China
Bingsi Tang	158211025@csu.edu.cn	Department of Dermatology, the Second Xiangya Hospital, Central South University, Changsha, China
Bihui Yu	sabaru618@126.com	Department of Dermatology, the Second Xiangya Hospital, Central South University, Changsha, China
Xin Li	lixin0816@csu.edu.cn	Department of Dermatology, the Second Xiangya Hospital, Central South University, Changsha, China
Xiaofei Gao	496835860@qq.com	Department of Dermatology, the Second Xiangya Hospital, Central South University, Changsha, China
Yixi Hu	huyixi@csu.edu.cn	Department of Dermatology, the Second Xiangya Hospital, Central South University, Changsha, China
Xiaole Ren	2204120114@csu.edu.cn	Department of Dermatology, the Second Xiangya Hospital, Central South University, Changsha, China
Haofan Xue	1228053563@qq.com	Department of Dermatology, the Second Xiangya Hospital, Central South University, Changsha, China
Zhangming Wei	2204120112@csu.edu.cn	Department of Dermatology, the Second Xiangya Hospital, Central South University, Changsha, China
Jinwei Chen	jinwei7310@163.com	Department of Rheumatology and Immunology, The Second Xiangya Hospital, Central South University, Changsha, China
Fen Li	13973127520@139.com	Department of Rheumatology and Immunology, The Second Xiangya Hospital, Central South University, Changsha, China
Guanghui Lin	doctorlgh@163.com	Department of Rheumatology and Immunology, The Second Xiangya Hospital, Central South University, Changsha, China
Jia Wang	wangjia2016@csu.edu.cn	Department of Rheumatology and Immunology, The Second Xiangya Hospital, Central South University, Changsha, China
Hui Luo	luohuihn@sina.com	Department of Rheumatology and Immunology, Xiangya Hospital of Central South University, Changsha
Hongjun Zhao	258349035@qq.com	Department of Rheumatology and Immunology, Xiangya Hospital of Central South University, Changsha
Sen Yang	yang2004sen@163.com	Institute of Dermatology and Department of Dermatology, The First Affiliated Hospital, Anhui Medical University, Hefei, Anhui, China.
Yong Cui	wuhucuiyong@vip.163.com	Department of Dermatology, China-Japan Friendship Hospital, Beijing 100029, China.
Youkun Lin	linyoukun7@aliyun.com	Department of Dermatology, the First Affiliated Hospital of Guangxi Medical University, Nanning 530021, China.
Xu Yao	dryao_xu@126.com	Institute of Dermatology, Chinese Academy of Medical Sciences and Peking Union Medical College, Nanjing, China.
Lingyun Sun	lingyunsun2012@163.com	Department of Dermatology, Gulou Affiliated Hospital to Medical College of Nanjing University, Nanjing 210008, People's Republic of China. The Affiliated Drum Tower Hospital of Nanjing University Medical School, Nanjing, China, Department of Rheumatology and Immunology, 321 Zhongshan Road, Nanjing, CN 210008, +86-25-68182422
Qing Guo	guoqingzsy@163.com	Department of Dermatology, Sun Yat-sen Memorial Hospital, Sun Yat-sen University, Guangzhou, Guangdong 510120, China; Guangdong Provincial Key Laboratory of Malignant Tumor Epigenetics and Gene Regulation, Medical Research Center, Sun Yat-Sen Memorial Hospital, Sun Yat-Sen University, Guangzhou, Guangdong 510120, China. Electronic address: guoqingzsy@163.com.
Hong Fang	fanghongzy@sina.com	Department of Dermatology, the First Affiliated Hospital, College of Medicine, Zhejiang University, No. 79 Qingchun Road, Hangzhou, China.
Kang Zeng	nfpfkzk@126.com	Department of Dermatology and Venereology, Nanfang Hospital, Southern Medical University, Guangzhou, 510515, China. Electronic address: nfpfkzk@126.com.
Danqi Deng	danqid128@sina.com	Department of Dermatology, The Second Affiliated Hospital of Kunming Medical University, 650101, Kunming, China. Electronic address: danqid128@sina.com.
Jianzhong Zhang	13911815813@126.com	Department of Dermatology, Peking University People's Hospital, Beijing, China.
Yuzhen Li	liyuzhen@medmail.com.cn	Department of Dermatology, The Second Affiliated Hospital of Harbin Medical University, Harbin, China;
Xiongming Pu	puxiongming@126.com	Department of Dermatology, The People's Hospital of Xinjiang Uyghur Autonomous Region, Urumqi, 830000, China. xiongmipu@163.com.
Xiangping Liao	13507359887@139.com	Department of nephropathy and Rheumatology, The First People's Hospital of ChenZhou, ChenZhou, Hunan, China.
Xiqiang Dang	happydang1962@163.com	Laboratory of Children's Kidney Disease, Children's Medical Center, The Second Xiangya Hospital, Central South University Changsha 410000, Hunan, China.
Danlin Huang	dldaphne@sina.com	Laboratory of Children's Kidney Disease, Children's Medical Center, The Second Xiangya Hospital, Central South University Changsha 410000, Hunan, China.
Yumei Liang	liang.yumei@aliyun.com	Department of nephropathy and Rheumatology, Hunan Provincial People's Hospital, The First Affiliated Hospital of Hunan Normal University, Changsha, China
Qing Sun	sunqing7226@163.com	Department of Dermatology, Qilu Hospital, Shandong University, Jinan, Shandong 250012, P.R. China.
Hongju Xie	2553158@qq.com	Department of Medical Cosmetology, First Affiliated Hospital, University of South China, Hengyang Hunan 421001, China.
Li Zeng	zengli000000@aliyun.com	Department of Medical Cosmetology, First Affiliated Hospital, University of South China, Hengyang Hunan 421001, China.
Cibo Huang	huangcibo1208@139.com	Department of Rheumatology, Beijing Hospital, National Center of Gerontology, Beijing 100730, P.R. China.
Qingchun Diao	qchdiao@vip.sina.com	Department of Dermatology, Chongqing Traditional Chinese Medicine Hospital, Chongqing First People's Hospital, No. 40, Yuzhong District, Chongqing, 400011, China. qchdiao@vip.sina.com.
Juan Tao	tjhappy@126.com	Department of Dermatology, Union Hospital, Tongji Medical College, Huazhong University of Science and Technology (HUST), Wuhan430022, China. tjhappy@126.com.
Jianbin Yu	yjbdoctor@sina.com	Department of Dermatology, The First Affiliated Hospital of Zhengzhou University, Zhengzhou 450052, China.
Zhenlu Li	1419480293@qq.com	Department of Dermatology, Henan Provincial People's Hospital, People's Hospital of Zhengzhou University, School of Clinical Medicine, Henan University, Zhengzhou, Henan, 450003, China.
Hanshi Xu	xuhanshi@hotmail.com	Department of Rheumatology, The First Affiliated Hospital of Sun Yat-sen University, Guangzhou, China.
Hui Li	lihui580711@163.com	Departments of Dermatology, The First Affiliated Hospital, Chongqing Medical University, Chongqing, China.
Wei Lai	drlaiwei@163.com	Department of Dermatology and Venereology, The Third Affiliated Hospital, Sun Yat-sen University, Guangzhou, Guangdong 510630, China.
Xiguang Liu	liuxiguang5714@163.com	Department of Dermatology, Heilongjiang Provincial Hospital, Harbin, Heilongjiang, 150036, China.
Jingjing Wu	wjjjj@163.com	Department of Dermatology, Institute of Surgery Research, Daping Hospital, Army Medical University, Chongqing, 400042, China. wjjjj@163.com.
Tienan Li	Ltn8899@126.com	Department of Dermatology, the Seventh People's Hospital of Shenyang - Shenyang, China.
Tiechi Lei	tiechilei@gmail.com	Department of Dermatology, Renmin Hospital of Wuhan University, Wuhan 430060, China.
Qiuning Sun	sunqnzhy@yahoo.com	Department of Dermatology, Peking Union Medical College Hospital, Chinese Academy of Medical Sciences and Peking Union Medical College, Beijing 100730, China.
Yanjia Li	liyanjia2005@msn.com	Department of Dermatology, The First Hospital of Hebei Medical University, Shijiazhuang, Hebei 050031, China
Guoqiang Zhang	zgq810328@sina.com	Department of Dermatology, The First Hospital of Hebei Medical University, Shijiazhuang, Hebei 050031, China
Xin Huang	Xin.huang@hunnu.edu.cn	Department of epidemiology, Medical School of Hunan Normal University, Changsha, China.
